# Supplementary material for: Li1.2Mn0.6Ni0.1Co0.1O2 microspheres constructed by hierarchically arranged nanoparticles as lithium battery cathode with enhanced electrochemical performance
Source: Royal Society of Chemistry journal article supplement (doi:10.1039/c4nr04314f), 2014-01-01
Supplement: c4nr04314f1.pdf [file c4nr04314f1.pdf]

Electronic Supplementary Information

$\text{Li}_{1.2}\text{Mn}_{0.6}\text{Ni}_{0.1}\text{Co}_{0.1}\text{O}_2$  Microspheres Constructed by Hierarchically  
Arranged Nanoparticles as Lithium Battery Cathode with Enhanced  
Electrochemical Performance

P. Remith<sup>a</sup> and N. Kalaiselvi<sup>a\*</sup>

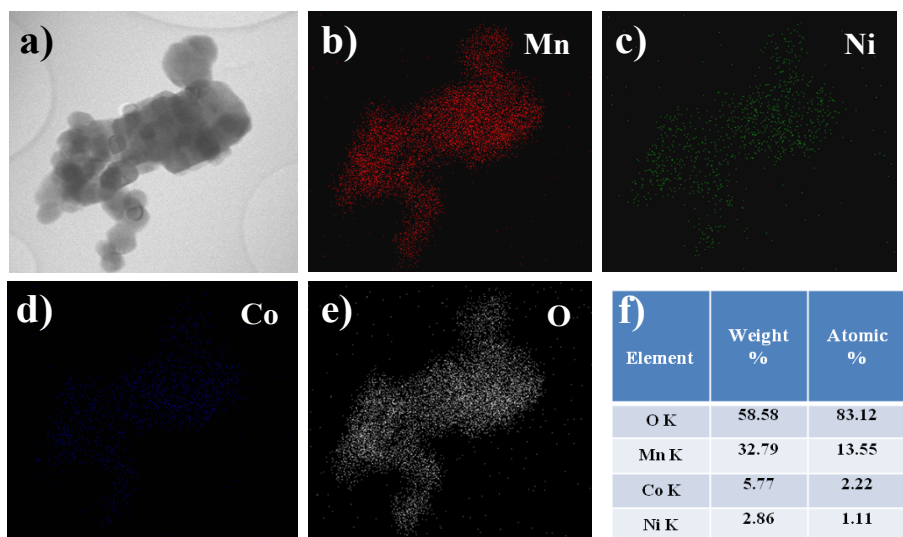

**Fig. S1.** STEM elemental mapping of pristine  $\text{Li}_{1.2}\text{Mn}_{0.6}\text{Ni}_{0.1}\text{Co}_{0.1}\text{O}_2$

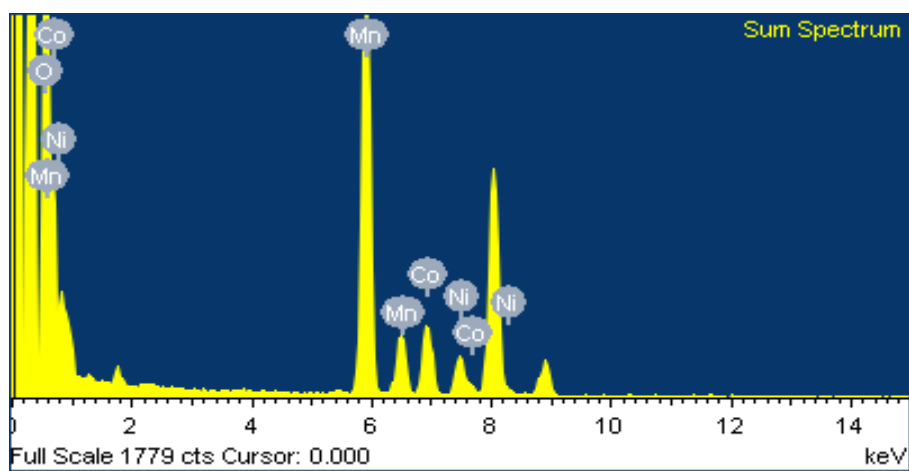

**Fig. S2.** EDX spectrum of  $\text{Li}_{1.2}\text{Mn}_{0.6}\text{Ni}_{0.1}\text{Co}_{0.1}\text{O}_2$

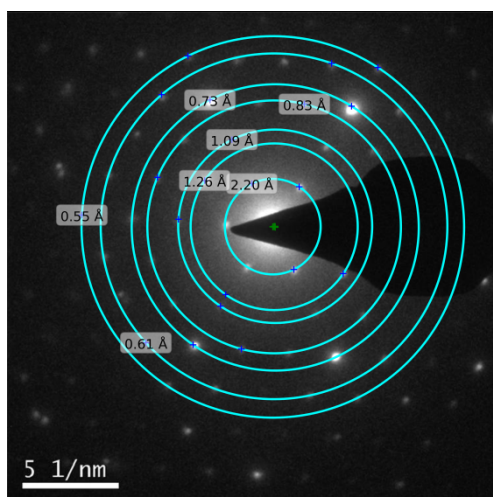

**Fig. S3.** Selected Area Electron Diffraction (SAED) pattern of as-synthesized  $\text{Li}_{1.2}\text{Mn}_{0.6}\text{Ni}_{0.1}\text{Co}_{0.1}\text{O}_2$  material.

**Table 1.** hkl values of  $R\bar{3}m$  and  $C2/m$  space groups and the corresponding d spacing values.

| $R\bar{3}m$ | $C2/m$ | d spacing (XRD) (Å) | d spacing (TEM) (Å) |
|-------------|--------|---------------------|---------------------|
| 003         | 001    | 2.2                 | 2.2                 |
| ---         | 020    | 1.26                | 1.26                |
| ---         | 110    | 0.84                | 0.84                |
| 101         | 111    | 0.645               | 0.61                |
| 006         | 002    | 1.089               | 1.07                |
| 012         | 13-1   | 0.55                | 0.556               |
| 104         | 131    | 0.84                | 0.83                |
| 015         | 13-2   | 0.828               | 0.812               |
| 107         | 132    | 0.56                | 0.55                |
| 018         | 13-3   | 0.73                | 0.73                |
| 110         | 331    | 0.66                | 0.61                |

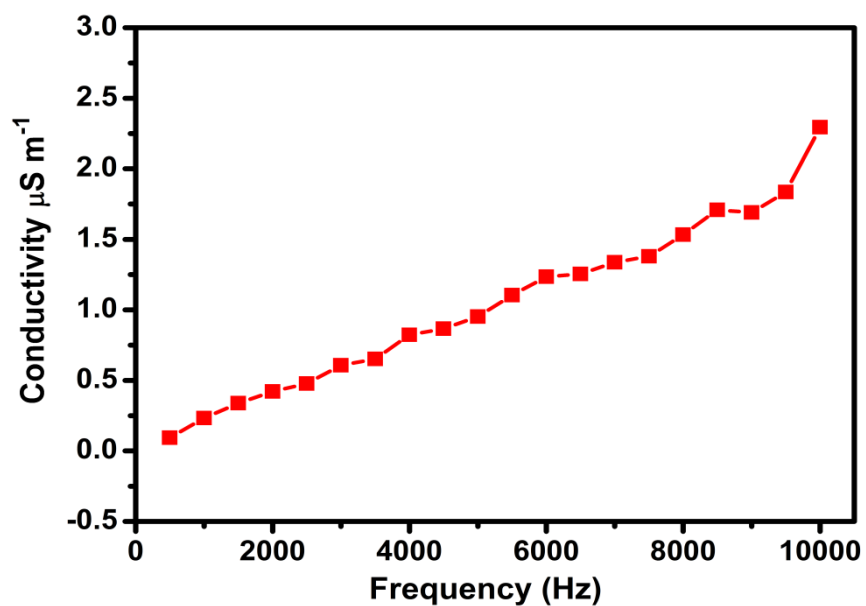

Fig. S4. Room temperature conductivity plot of  $\text{Li}_{1.2}\text{Mn}_{0.6}\text{Ni}_{0.1}\text{Co}_{0.1}\text{O}_2$

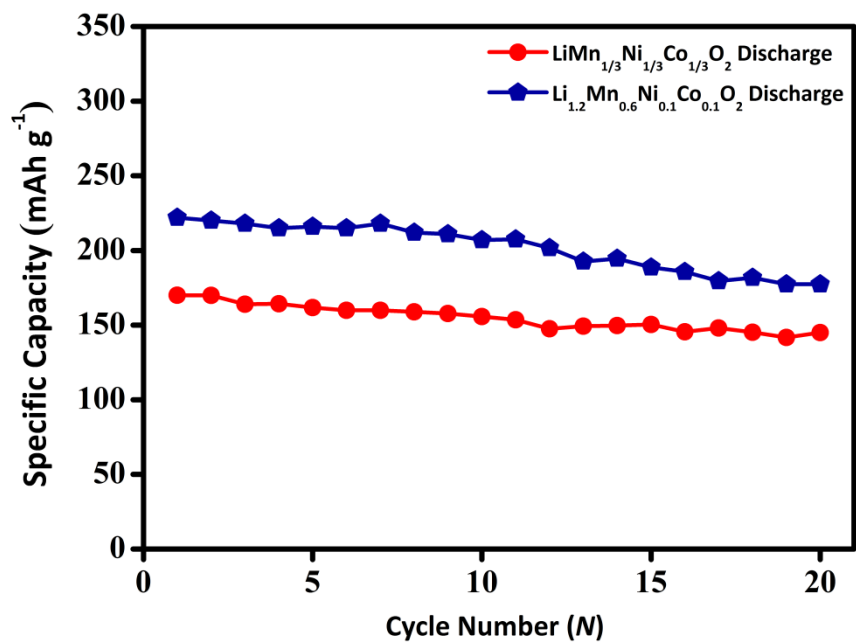

Fig. S5. Comparison of discharge capacity values of  $\text{LiMn}_{1/3}\text{Ni}_{1/3}\text{Co}_{1/3}\text{O}_2$  and  $\text{Li}_{1.2}\text{Mn}_{0.6}\text{Ni}_{0.1}\text{Co}_{0.1}\text{O}_2$  cathodes
